# Supplementary material
Source: PubMed Central journal article supplement (PMC3926075)
Supplement: 1318405111_pnas.201318405SI.pdf [file 1318405111_pnas.201318405SI.pdf]

# Supporting Information

Kisley et al. 10.1073/pnas.1318405111

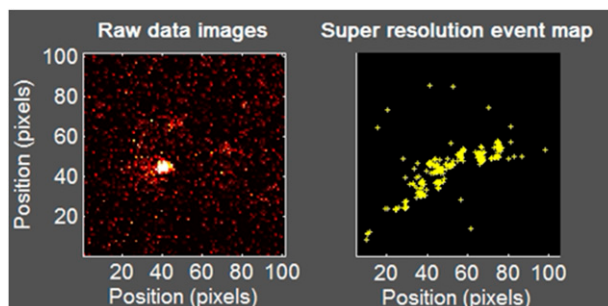

**Movie S1.** (Left) Real-time data of  $\alpha$ -lactalbumin interactions at the pentaargininamide interface in 10 mM NaCl buffer and (Right) the respective super-resolution Gaussian centroid positions of spatially mapped events over time. The area is  $3.2 \times 3.2 \mu\text{m}$  in size ( $100 \times 100$  pixels).

[Movie S1](#)

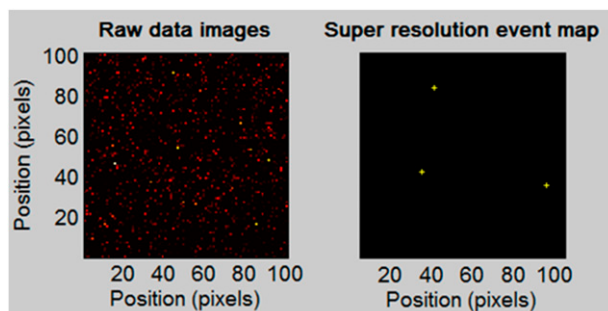

**Movie S2.** (Left) Real-time data of  $\alpha$ -lactalbumin interactions at the 215- $\mu\text{M}$  monoargininamide interface in 10 mM NaCl buffer and (Right) the respective super-resolution Gaussian centroid positions of spatially mapped events over time. The field of view is  $3.2 \times 3.2 \mu\text{m}$  in size ( $100 \times 100$  pixels).

[Movie S2](#)

## Other Supporting Information Files

[SI Appendix \(PDF\)](#)
